# Supplementary material for: Describe Molecules by a Heterogeneous Graph Neural Network with Transformer-like Attention for Supervised Property Predictions
Source: PubMed Central journal article supplement — ACS Omega. 2022 Jan 21;7(4):3713–21. doi: 10.1021/acsomega.1c06389 (PMC8811943; doi:10.1021/acsomega.1c06389), 2022-01-21
Supplement: ao1c06389_si_001.pdf [file ao1c06389_si_001.pdf]

# **Describe molecules by a heterogeneous graph neural network with transformer-like attentions for supervised property predictions**

Daiguo Deng<sup>1</sup>, Zengrong Lei<sup>1</sup>, Xiaobin Hong<sup>1</sup>, Ruochi Zhang<sup>1,3,\*</sup>, Fengfeng Zhou<sup>2,\*</sup>.

1 Fermion Technology Co., Ltd, Guangzhou, Guangdong 510000, P.R. China,

2 College of Computer Science and Technology, and Key Laboratory of Symbolic Computation and Knowledge Engineering of Ministry of Education, Jilin University, Changchun, Jilin 130012, P.R. China.

3 School of Artificial Intelligence, Jilin University, Changchun 130012, P.R. China.

\* Correspondence may be addressed to Fengfeng Zhou: [FengfengZhou@gmail.com](mailto:FengfengZhou@gmail.com) or [ffzhou@jlu.edu.cn](mailto:ffzhou@jlu.edu.cn) . Lab web site: <http://www.healthinformatics.org/> . Phone: +86-431-8516-6024. Fax: +86-431-8516-6024. Correspondence may also be addressed to Ruochi Zhang: [zrc720@gmail.com](mailto:zrc720@gmail.com) .

**Table S1. The number of parameters in different setting of HiddenState and LayerNum.** The column HiddenState represents the dimension of the hidden states of a given model. The column LayerNum is the number of graph layers. The NumParam is the total number of the MolHGT parameters.

| HiddenState | LayerNum | NumParam | HiddenState | LayerNum | NumParam  |
|-------------|----------|----------|-------------|----------|-----------|
| 200         | 2        | 3461643  | 520         | 2        | 23137132  |
| 200         | 3        | 5035293  | 520         | 3        | 33708542  |
| 200         | 4        | 6608943  | 520         | 4        | 44279952  |
| 240         | 2        | 4968392  | 560         | 2        | 26821941  |
| 240         | 3        | 7229962  | 560         | 3        | 39079671  |
| 240         | 4        | 9491532  | 560         | 4        | 51337401  |
| 280         | 2        | 6747421  | 600         | 2        | 30778129  |
| 280         | 3        | 9821711  | 600         | 3        | 44846979  |
| 280         | 4        | 12896001 | 600         | 4        | 58915829  |
| 320         | 2        | 8798249  | 640         | 2        | 35007438  |
| 320         | 3        | 12810059 | 640         | 3        | 51012208  |
| 320         | 4        | 16821869 | 640         | 4        | 67016978  |
| 360         | 2        | 11121778 | 680         | 2        | 39508006  |
| 360         | 3        | 16195908 | 680         | 3        | 57573496  |
| 360         | 4        | 21270038 | 680         | 4        | 75638986  |
| 400         | 2        | 13716986 | 720         | 2        | 44281815  |
| 400         | 3        | 19978236 | 720         | 3        | 64532825  |
| 400         | 4        | 26239486 | 720         | 4        | 84783835  |
| 440         | 2        | 16585015 | 760         | 2        | 49326763  |
| 440         | 3        | 24158185 | 760         | 3        | 71888093  |
| 440         | 4        | 31731355 | 760         | 4        | 94449423  |
| 480         | 2        | 19724603 | 800         | 2        | 54645072  |
| 480         | 3        | 28734493 | 800         | 3        | 79641522  |
| 480         | 4        | 37744383 | 800         | 4        | 104637972 |
